# Supplementary material for: Standardised comparison of limonene-derived monoterpenes identifies structural determinants of anti-inflammatory activity
Source: PubMed Central journal article supplement (PMC7190660; doi:10.1038/s41598-020-64032-1), 2020-04-29
Supplement: 41598_2020_64032_MOESM1_ESM.pdf [file 41598_2020_64032_MOESM1_ESM.pdf]

## **Supplementary material to:**

# **Standardised comparison of limonene-derived monoterpenes identifies structural determinants of anti-inflammatory activity**

Cátia Sousa<sup>a,b,c</sup>, Alcino Jorge Leitão<sup>a,b,c</sup>, Bruno Miguel Neves<sup>d</sup>, Fernando Judas<sup>a,c,e</sup>,

Carlos Cavaleiro<sup>b,f</sup>, Alexandrina Ferreira Mendes<sup>a,b,c</sup>\*

### **Affiliations:**

<sup>a</sup>Center for Neuroscience and Cell Biology, University of Coimbra, Coimbra, Portugal

<sup>b</sup>Faculty of Pharmacy, University of Coimbra, Coimbra, Portugal

<sup>c</sup>Centre for Innovative Biomedicine and Biotechnology, University of Coimbra, Coimbra, Portugal

<sup>d</sup>Department of Medical Sciences and Institute of Biomedicine – iBiMED, University of Aveiro, Aveiro, Portugal

<sup>e</sup>Orthopaedics Department and Bone Bank, University and Hospital Center of Coimbra, Coimbra, Portugal

<sup>f</sup>Chemical Process Engineering and Forest Products Research Centre, Chemical Engineering Department, Faculty of Sciences and Technology, University of Coimbra, Coimbra, Portugal

Figure S1

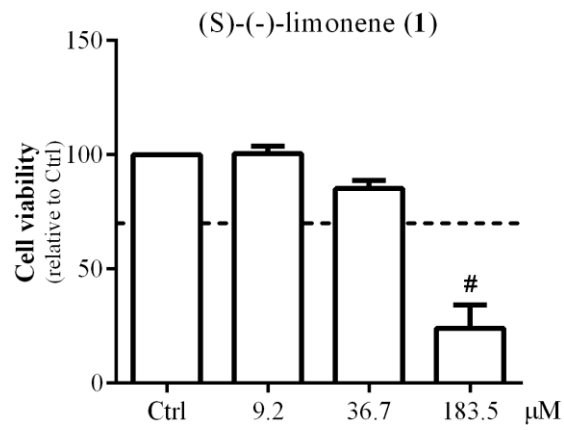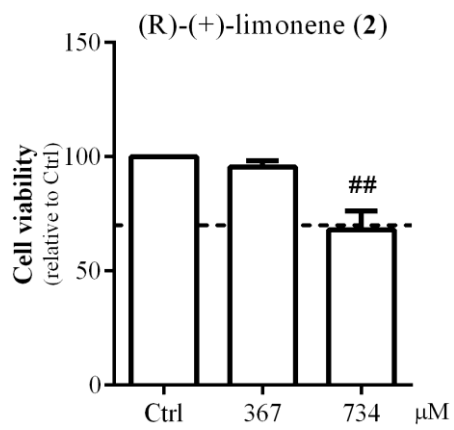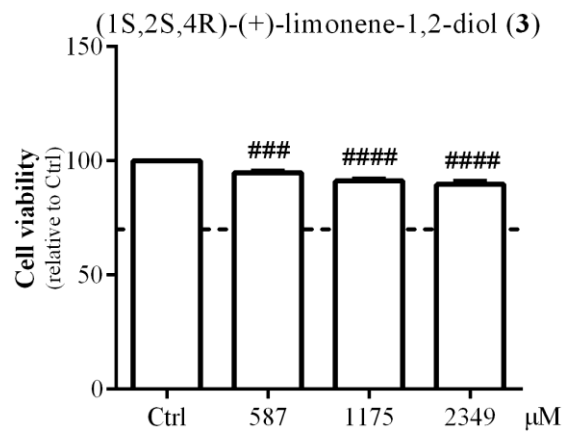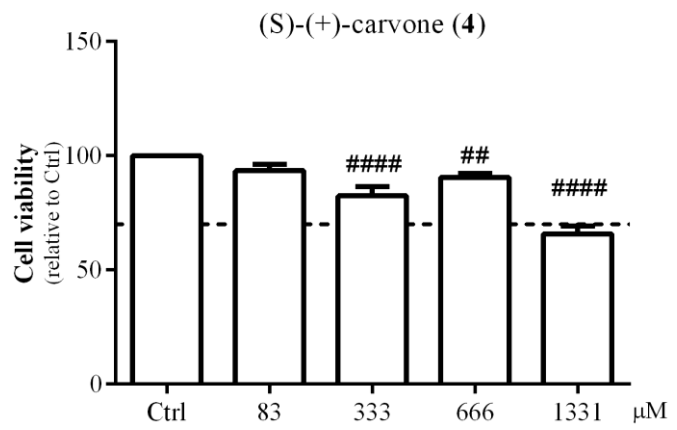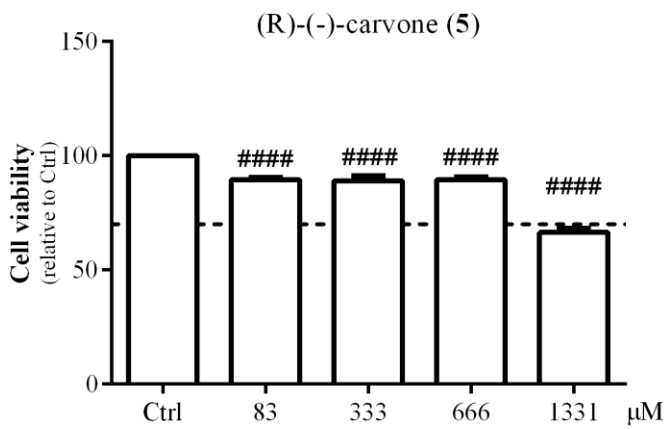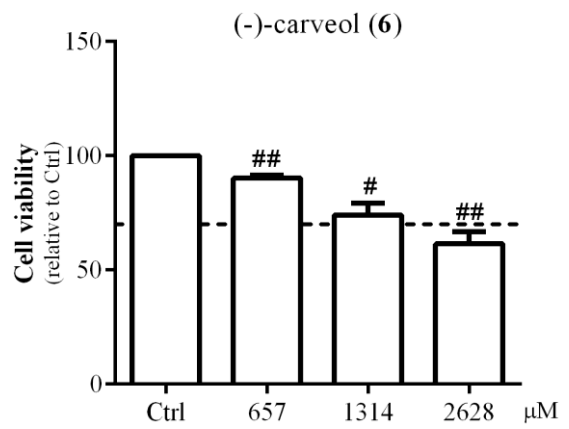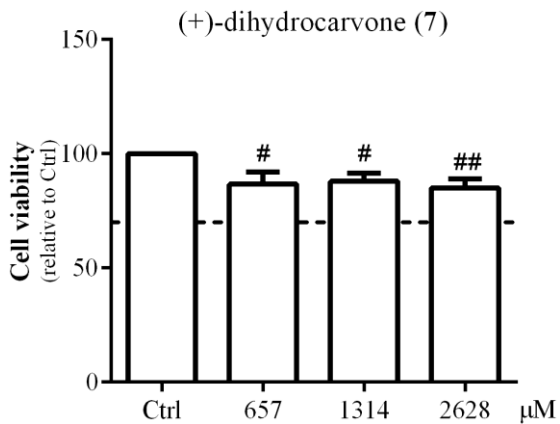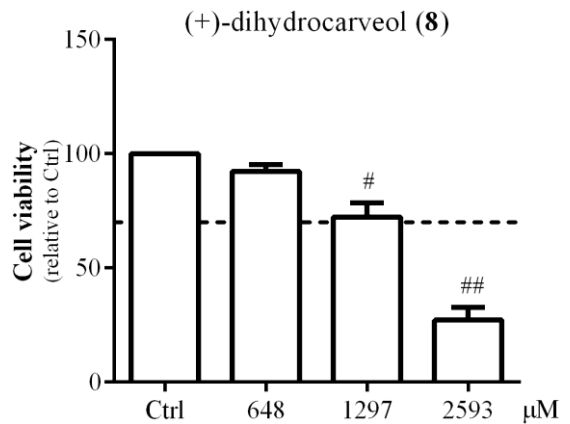

(-)-dihydrocarveol (9)

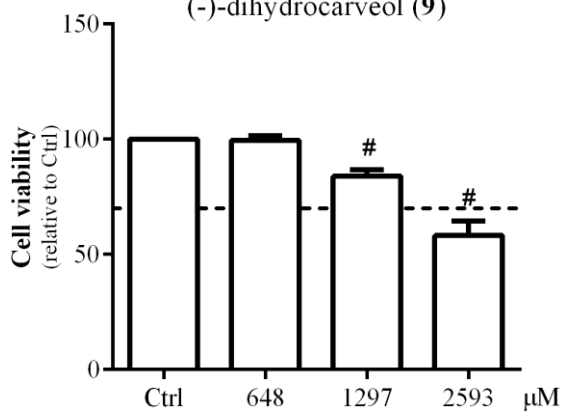

(+)-isopulegol (10)

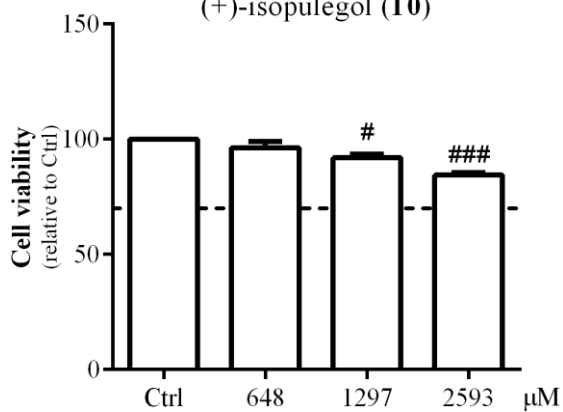

(-)-isopulegol (11)

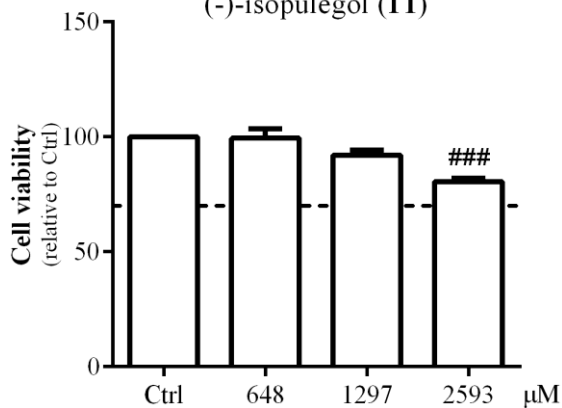

(R)-(+)-pulegone (12)

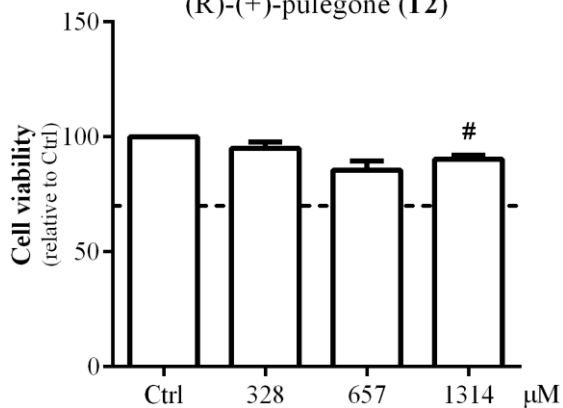

(S)-(-)-pulegone (13)

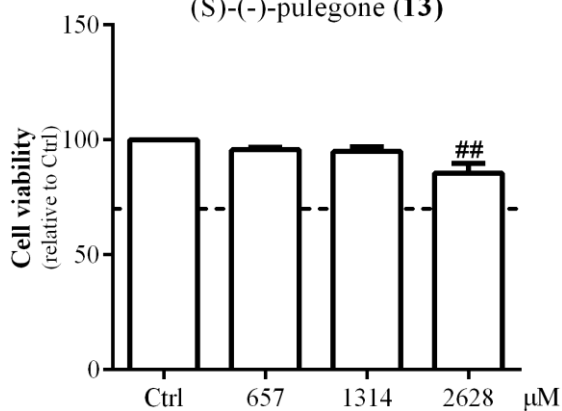

(-)-menthone (14)

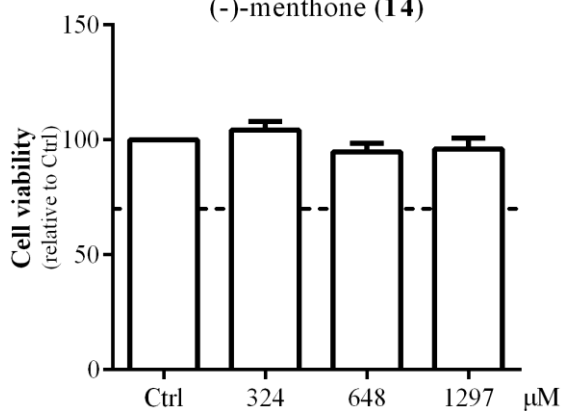

(-)-menthol (15)

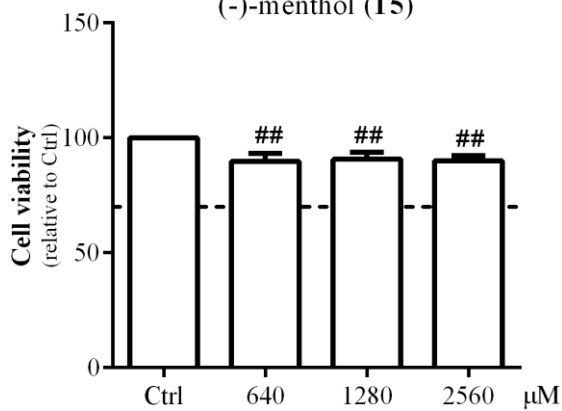

β-myrcene (16)

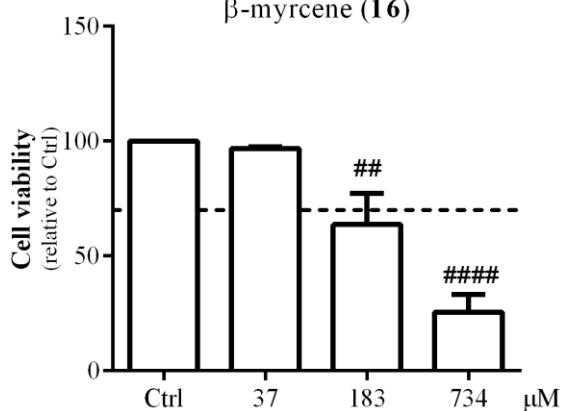

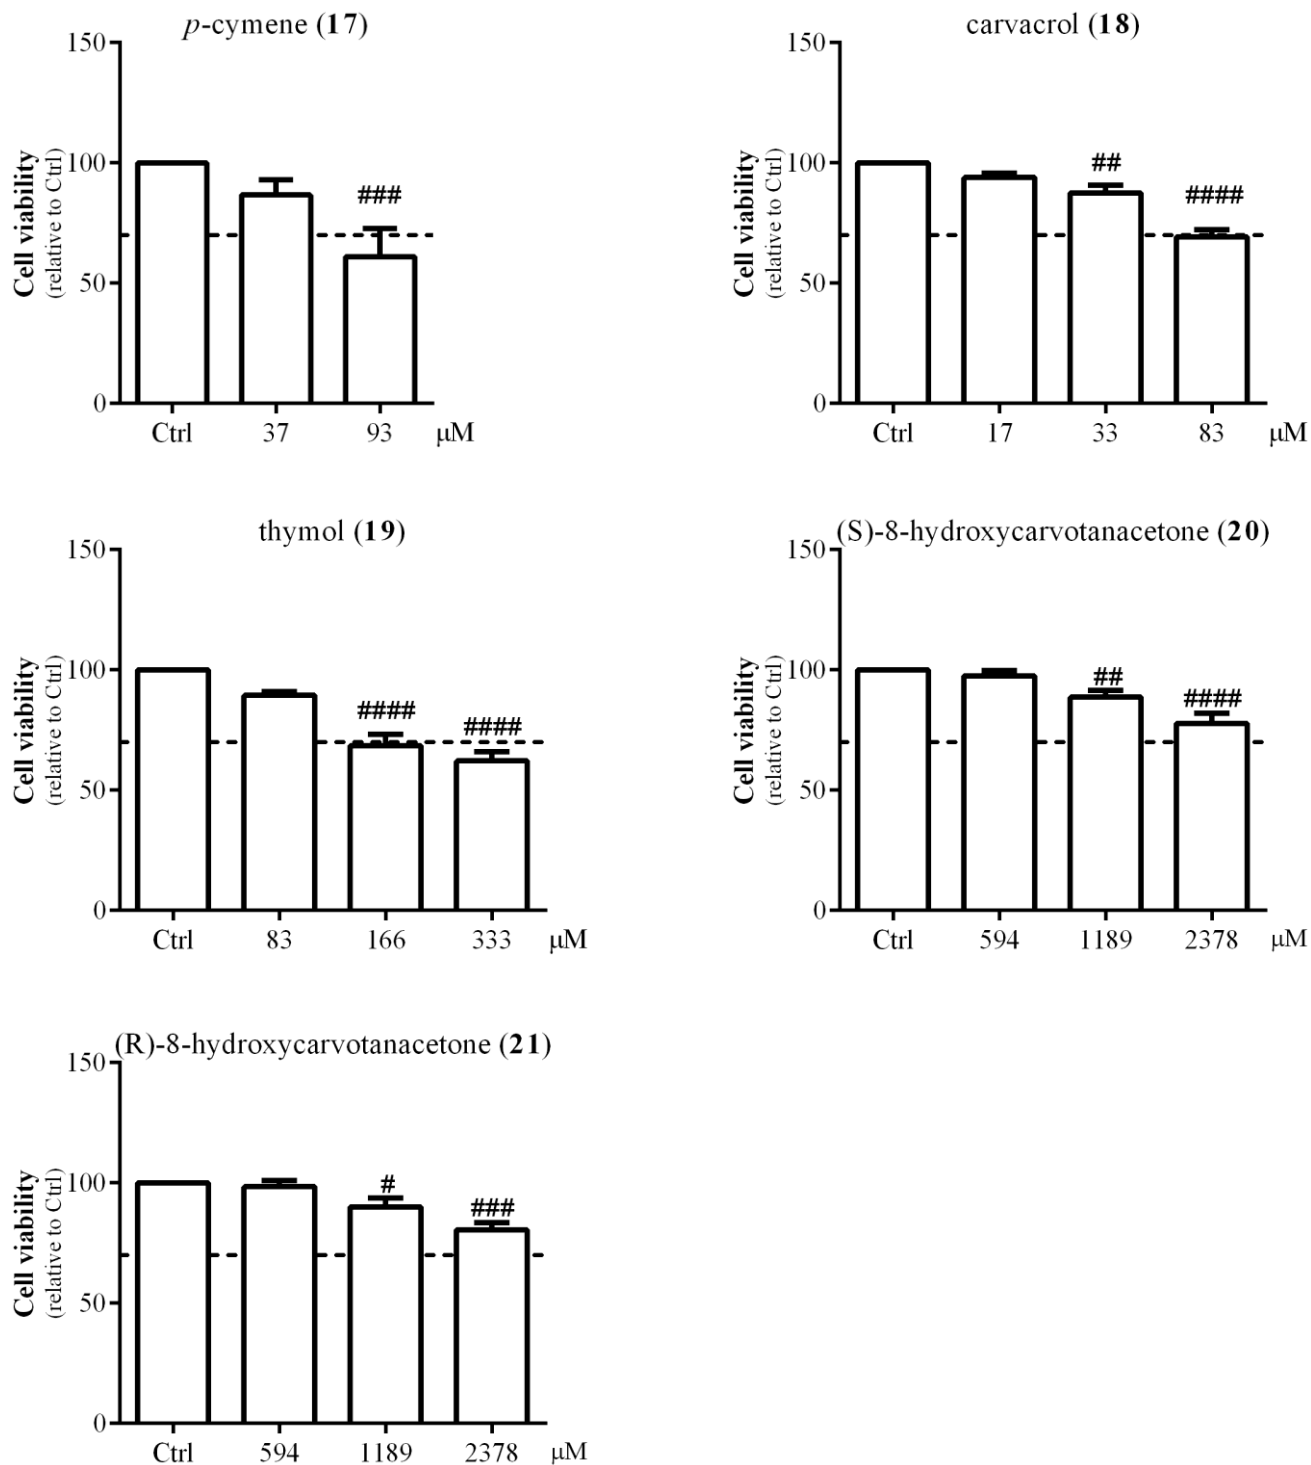

**Figure S1.** Evaluation of the cytotoxicity of the test compounds. Raw 264.7 cells were treated with the indicated concentrations of the each compound or with the vehicle (0.1% DMSO, control, Ctrl) for 18 h. Each column represents the mean  $\pm$  SEM of, at least, three independent experiments. # $p \leq 0.05$ , ## $p \leq 0.01$ , ### $p \leq 0.001$  and #### $p \leq 0.0001$  relative to Ctrl. The dotted line represents the threshold (70% of maximal viability) below which cytotoxicity is recognized, in agreement with standard ISO 10993-5.

Figure S2

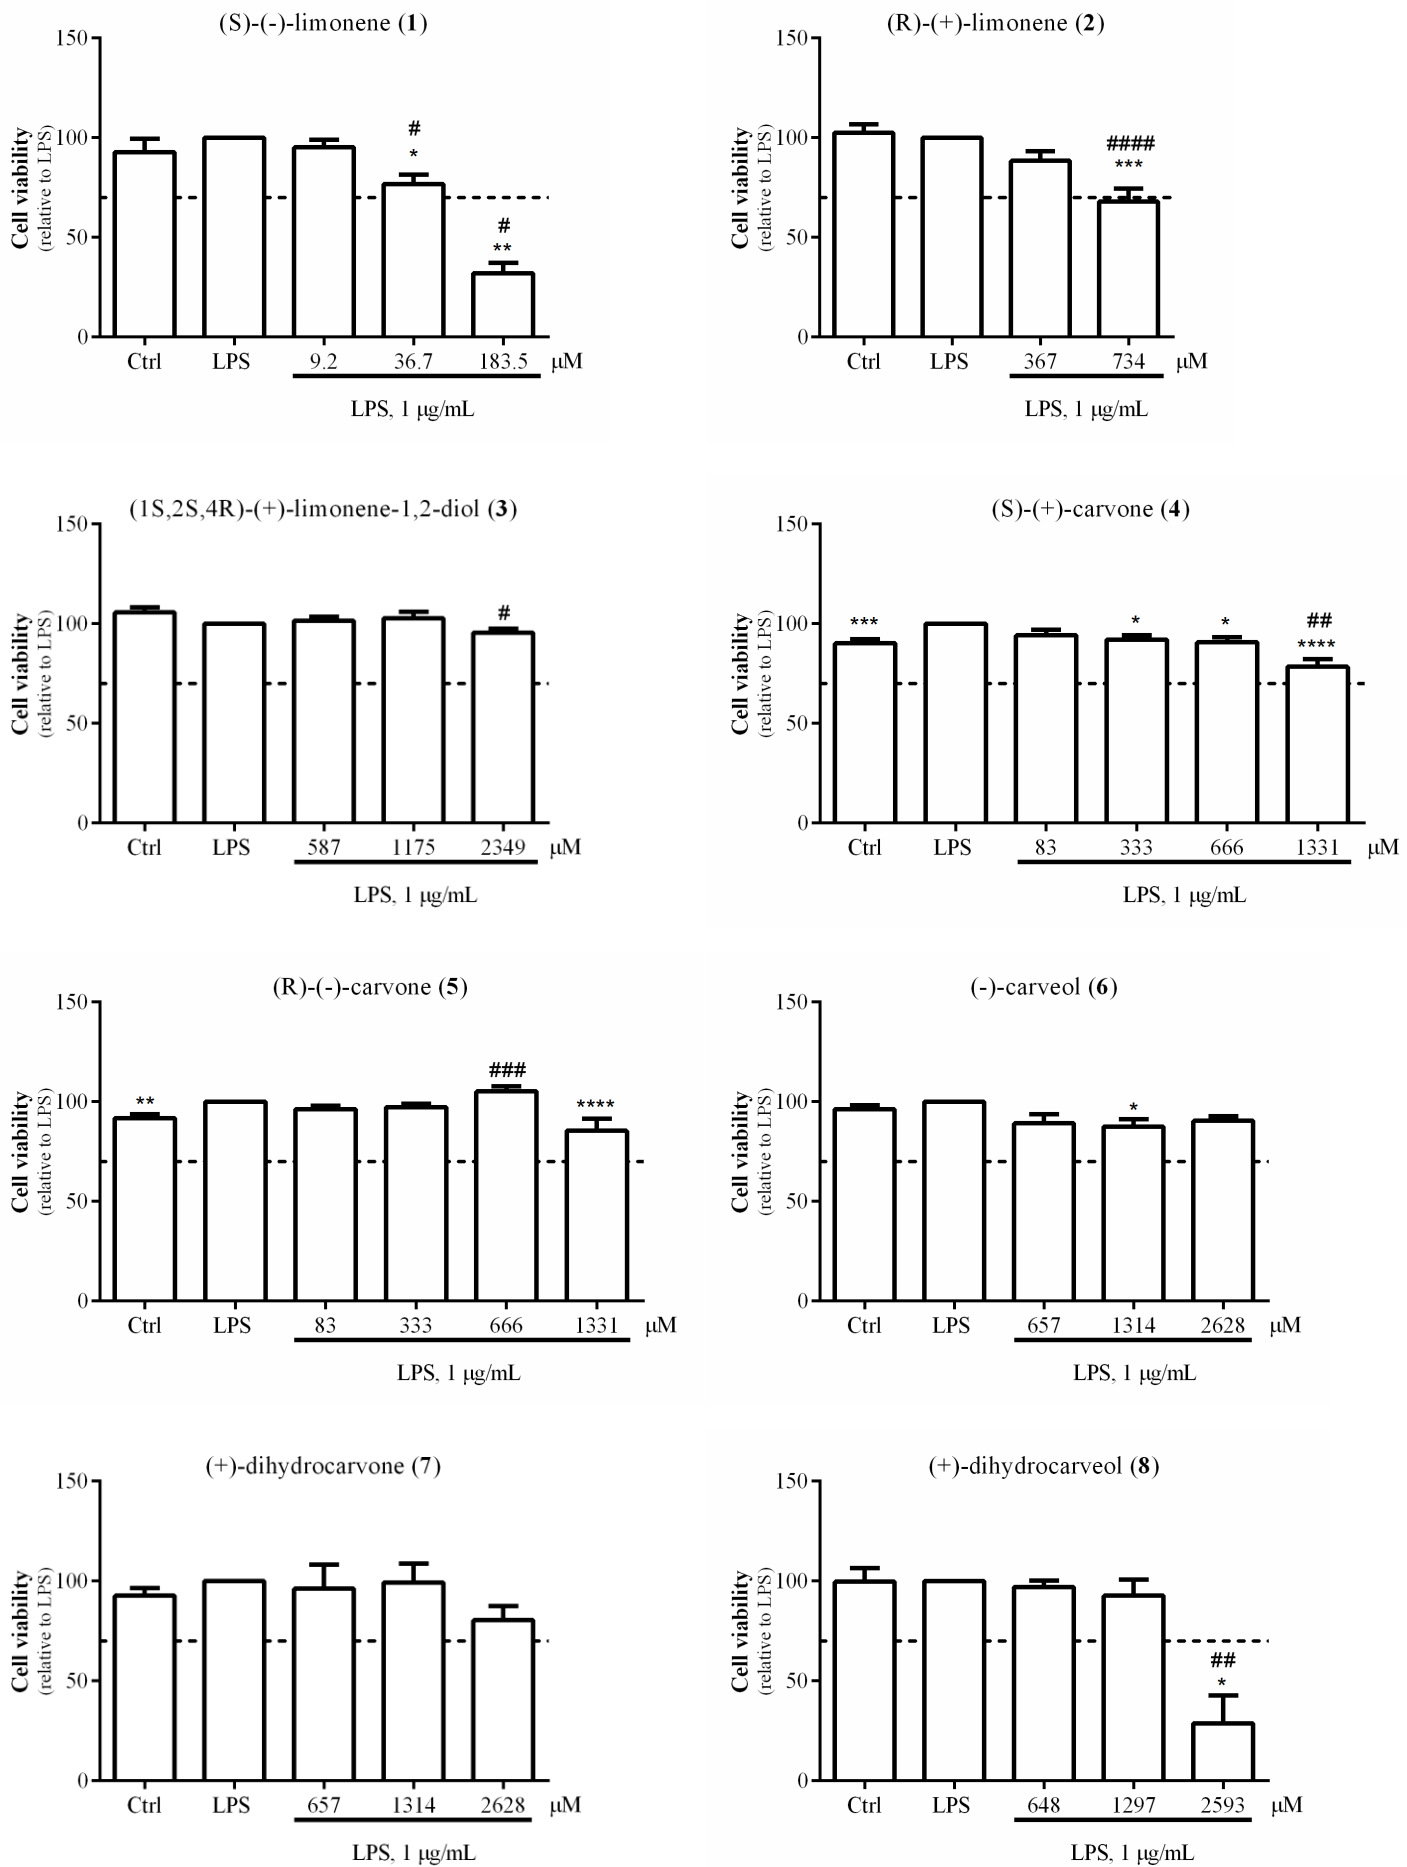

(-)-dihydrocarveol (9)

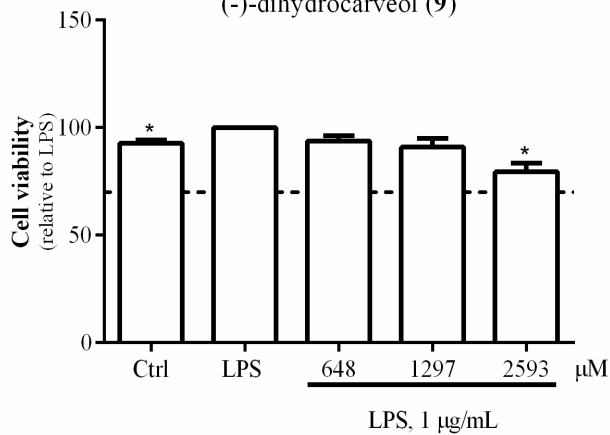

(+)-isopulegol (10)

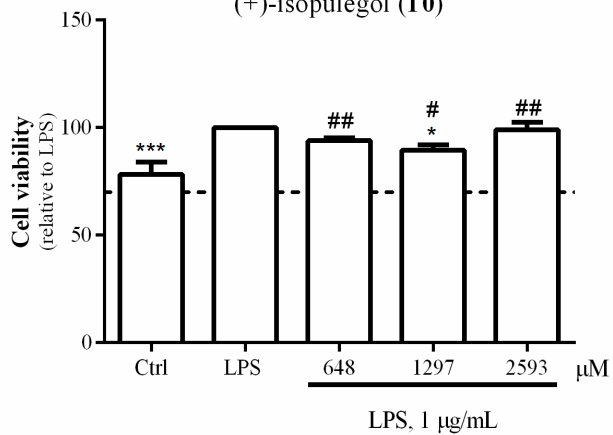

(-)-isopulegol (11)

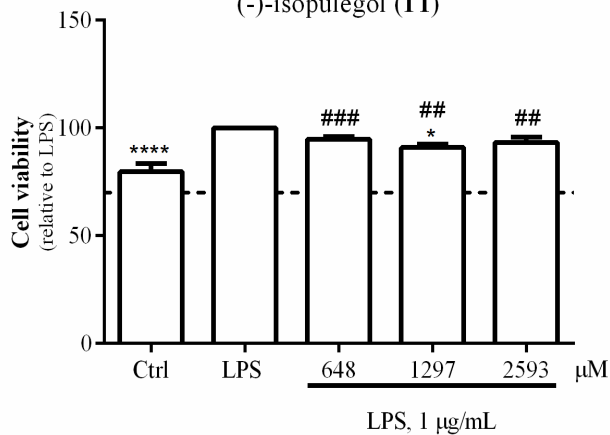

(R)-(+)-pulegone (12)

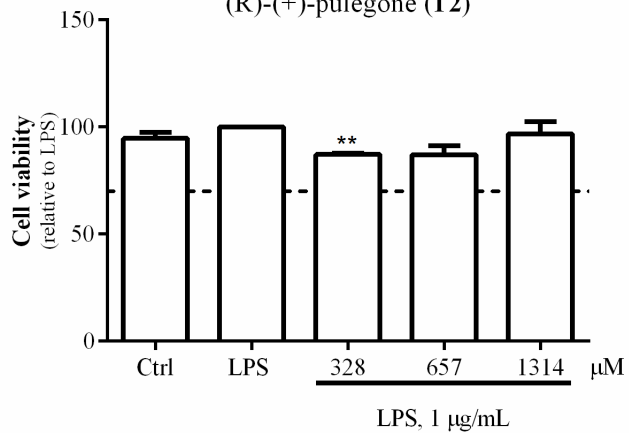

(S)-(-)-pulegone (13)

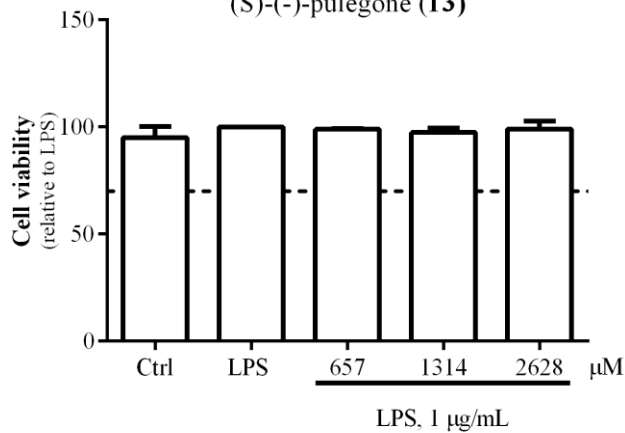

(-)-menthone (14)

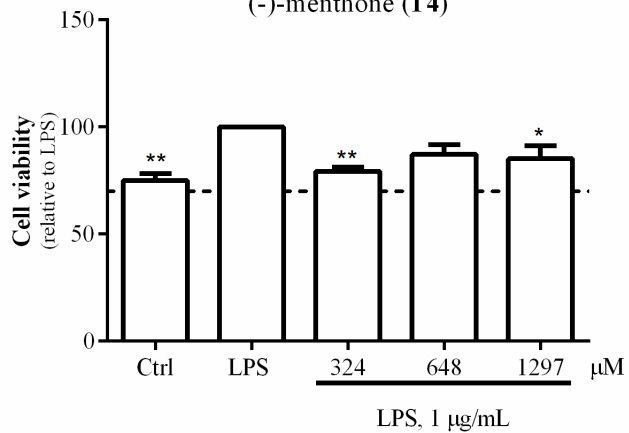

(-)-menthol (15)

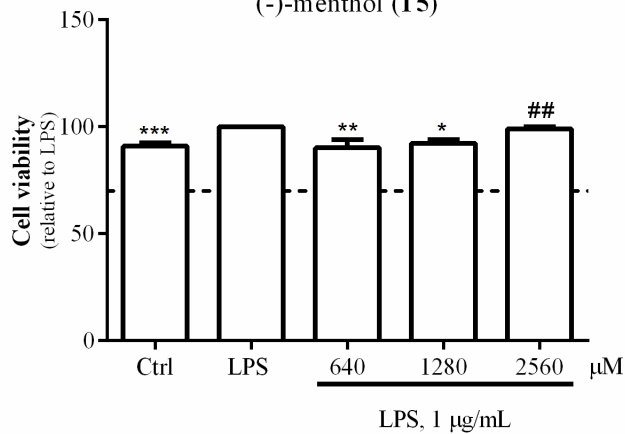

β-myrcene (16)

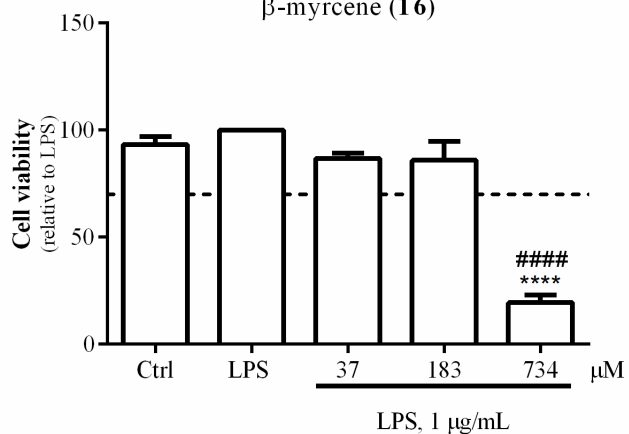

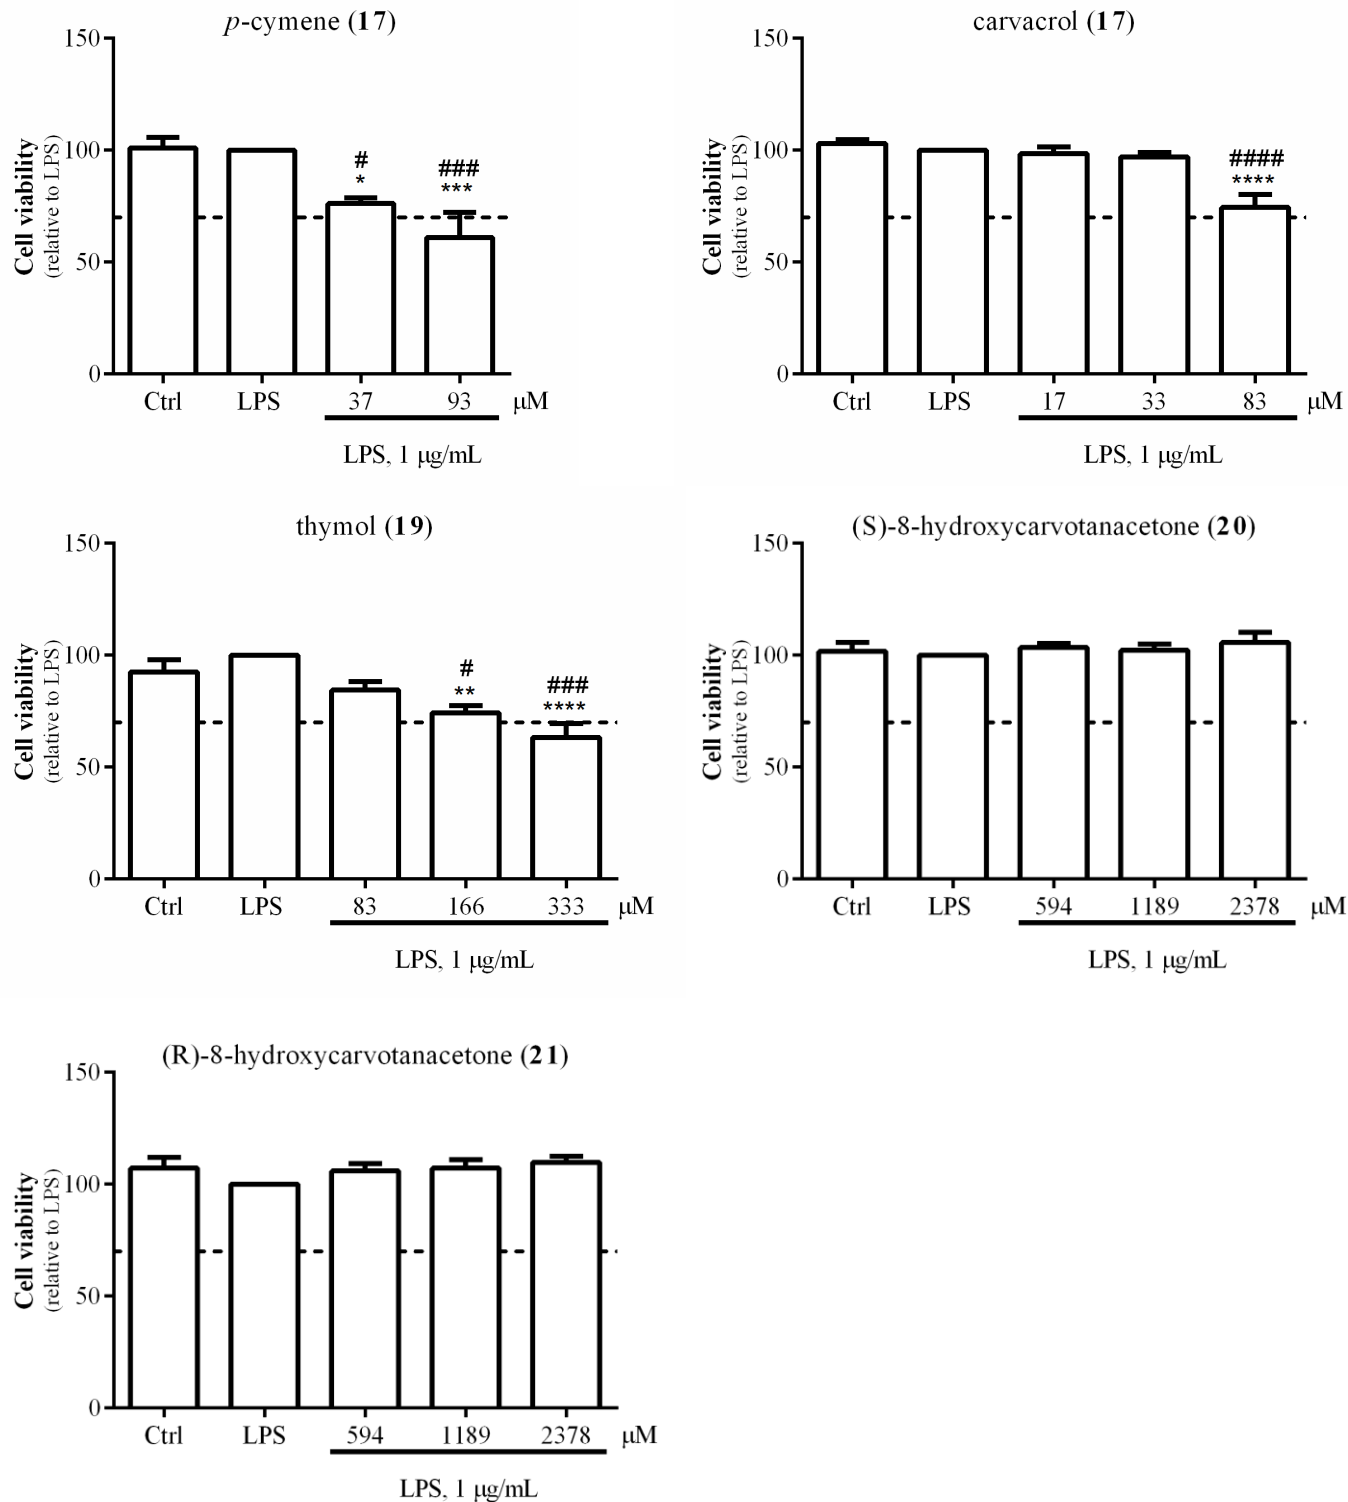

**Figure S2.** Evaluation of the cytotoxicity of the test compounds in the presence of bacterial lipopolysaccharide (LPS). Raw 264.7 cells were treated with LPS, 1 μg/mL, for 18 h, following pre-treatment for 1 h with the indicated concentrations of the test compounds or with vehicle (0.1% DMSO, Ctrl). Each column represents the mean ± SEM of ,at least, three independent experiments. \* $p \leq 0.05$ , \*\* $p \leq 0.01$ , \*\*\* $p \leq 0.001$  and \*\*\*\* $p \leq 0.0001$  relative to LPS-treated cells. # $p \leq 0.05$ , ## $p \leq 0.01$ , ### $p \leq 0.001$  and #### $p \leq 0.0001$  relative to Ctrl. The dotted line represents the threshold (70% of maximal viability) below which cytotoxicity is recognized, in agreement with standard ISO 10993-5.

Uncropped blots shown in **Figure 2b****(S)-(+)-carvone (4)**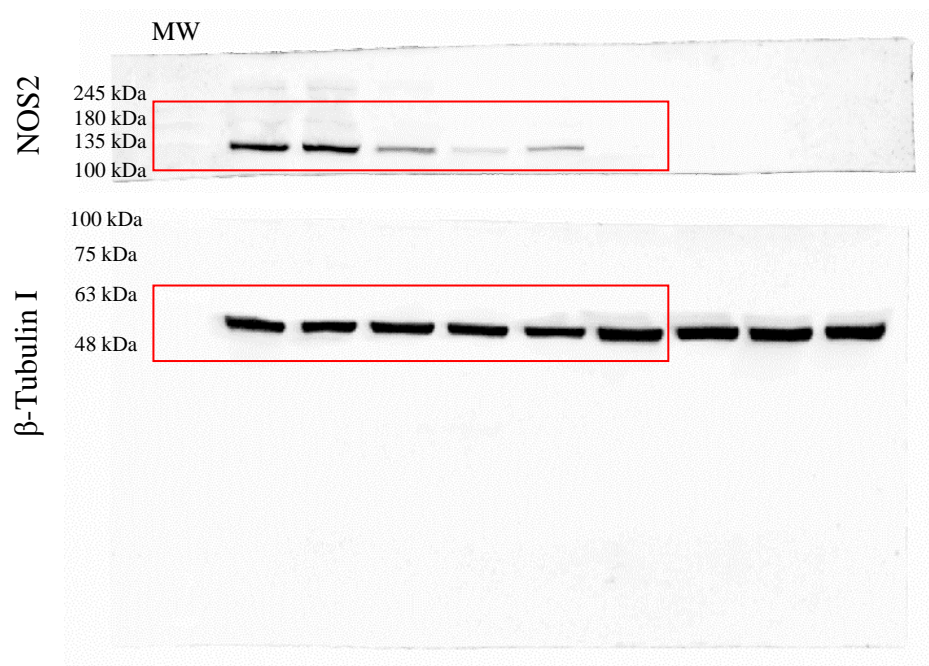**(R)-(-)-carvone (5)**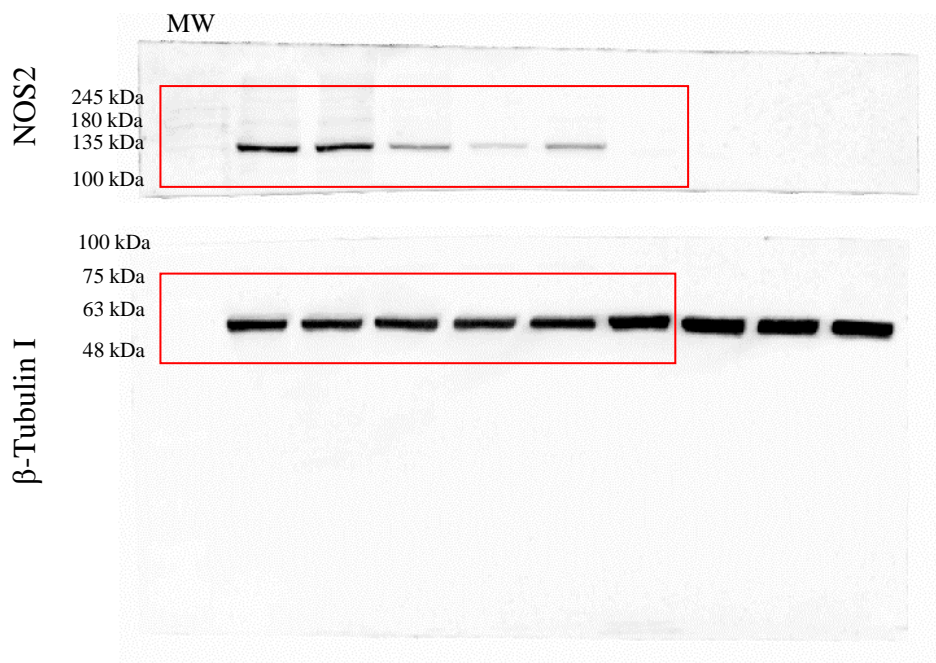

The membranes were cut at  $\approx 100$  kDa so that the upper piece was incubated with anti-NOS2 antibody and the lower one with the anti- $\beta$ -Tubulin I antibody.



Uncropped blots shown in **Figure 3b**

(S)-(+)-carvone (4)

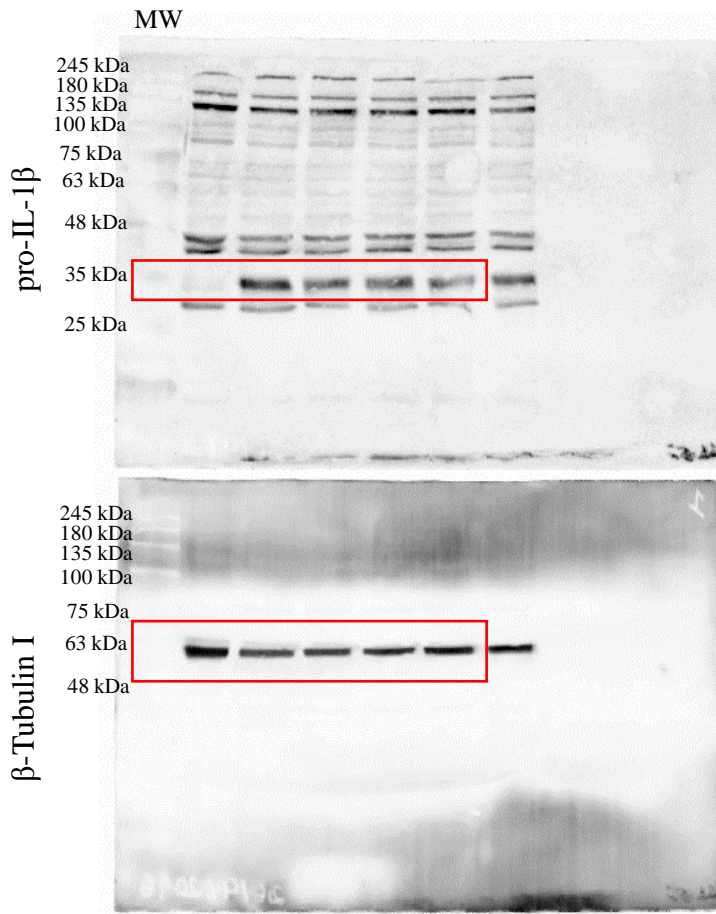

(R)-(-)-carvone (5)

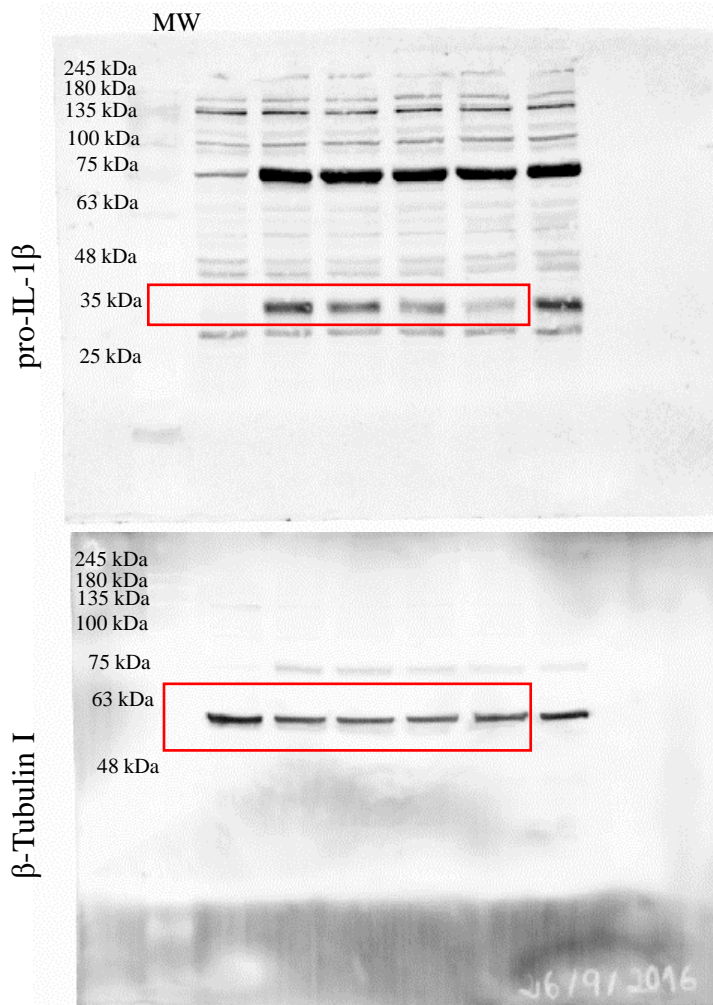

This membrane was also incubated with anti-COX2 antibody and the corresponding band appears near the 75 kDa molecular weight marker.

Uncropped blots shown in **Figure 4b**

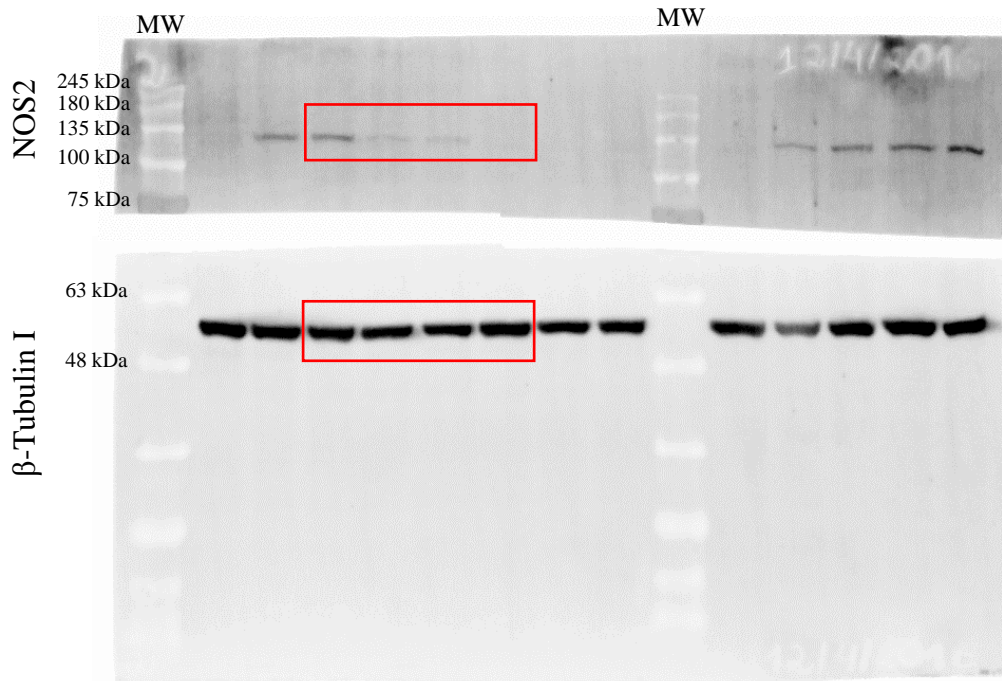

Uncropped blots shown in **Figure 4c**

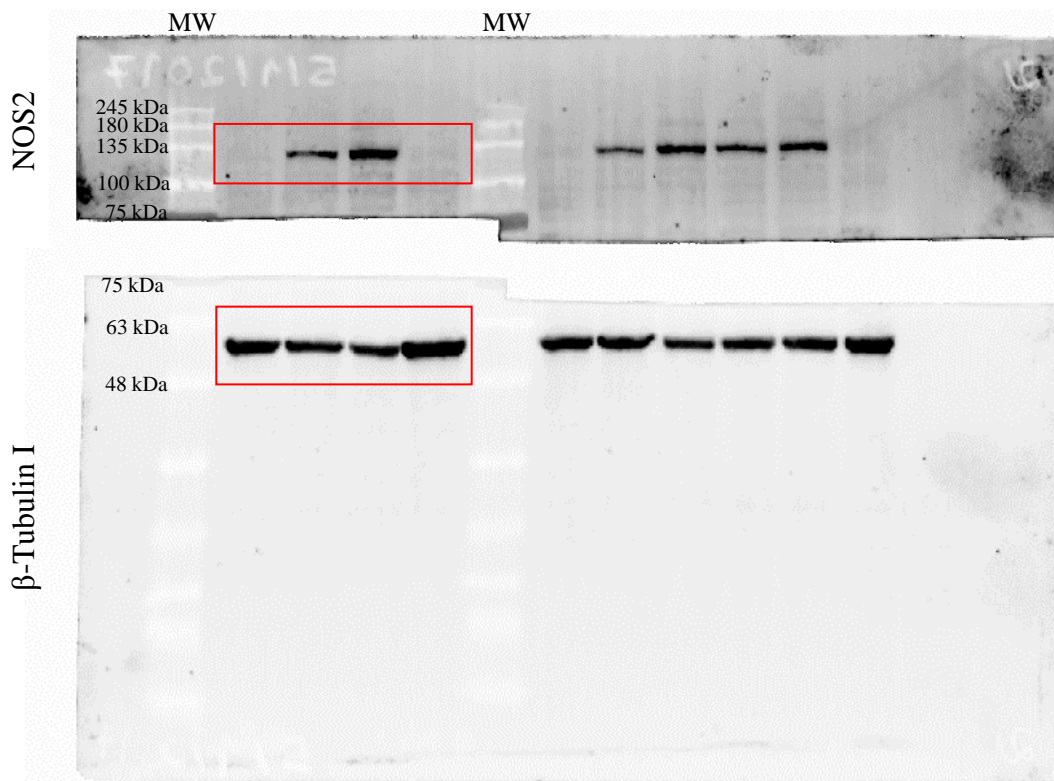

The membranes were cut at  $\approx 75$  kDa so that the upper piece was incubated with anti-NOS2 antibody and the lower one with the anti- $\beta$ -Tubulin I antibody.

Uncropped blots shown in **Figures 5b and 5d**

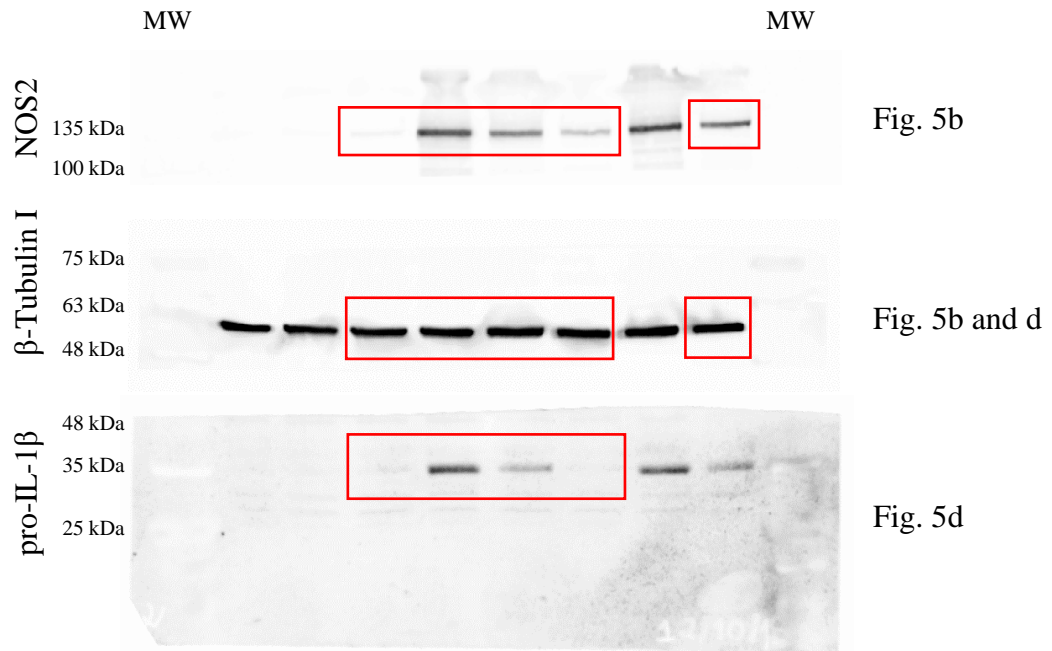

The membrane was cut between 100-75 kDa and 48 kDa so that the upper piece was incubated with anti-NOS2 antibody, the middle piece with anti- $\beta$ -Tubulin I antibody and the lower one with the anti-IL-1 $\beta$  antibody.

**Figure S3:** Uncropped images of the blots shown in figures 2-5.

**Table S1.** Purity and isomer composition of the test compounds

| <b>N°</b> | <b>Trivial name</b>              | <b>IUPAC name of major isomer</b>                                                                          | <b>Purity (%)*</b> | <b>Isomer composition</b>                                                     | <b>Catalog #, Vendor</b>   |
|-----------|----------------------------------|------------------------------------------------------------------------------------------------------------|--------------------|-------------------------------------------------------------------------------|----------------------------|
| <b>1</b>  | (S)-(-)-limonene                 | (4S)-1-methyl-4-prop-1-en-2-ylcyclohexene                                                                  | ≥ 95%**            | Purum                                                                         | #62130, Sigma-Aldrich Co.  |
| <b>2</b>  | (R)-(+)-limonene                 | (4R)-1-methyl-4-prop-1-en-2-yl-cyclohexene                                                                 | ≥ 99%              | Purum                                                                         | #62118, Sigma-Aldrich Co.  |
| <b>3</b>  | (1S,2S,4R)-(+)-limonene-1,2-diol | (1S,2S,4R)-1-methyl-4-prop-1-en-2-ylcyclohexane-1,2-diol                                                   | ≥ 97%              | Purum                                                                         | #669768, Sigma-Aldrich Co. |
| <b>4</b>  | (S)-(+)-carvone                  | (5S)-2-methyl-4-prop-1-en-2-ylcyclohex-2-en-1-one                                                          | ≥ 96%**            | Purum                                                                         | #435759, Sigma-Aldrich Co. |
| <b>5</b>  | (R)-(-)-carvone                  | (5R)-2-methyl-4-prop-1-en-2-ylcyclohex-2-en-1-one                                                          | 98%                | Purum                                                                         | #124931, Sigma-Aldrich Co. |
| <b>6</b>  | (-)-carveol                      | (1R,5R)-2-methyl-5-prop-1-en-2-ylcyclohex-2-en-1-ol<br>(1S,5R)-2-methyl-5-prop-1-en-2-ylcyclohex-2-en-1-ol | ≥ 98%              | Mixture of isomers                                                            | #61370, Sigma-Aldrich Co.  |
| <b>7</b>  | (+)-dihydrocarvone               | (2R,5R)-2-methyl-5-prop-1-en-2-ylcyclohexan-1-one<br>(2S,5R)-2-methyl-5-prop-1-en-2-ylcyclohexan-1-one     | ≥ 98%              | Mixture of isomers                                                            | #09164, Sigma-Aldrich Co.  |
| <b>8</b>  | (+)-dihydrocarveol               | (1S,2S,5S)- 2-methyl-5-prop-1-en-2-ylcyclohexan-1-ol                                                       | ≥ 95%              | Mixture of isomers – composition: n, ~ 75% iso, ~ 6% neo, ~ 3% neoiso, ~ 1.3% | #37277, Sigma-Aldrich Co.  |
| <b>9</b>  | (-)-dihydrocarveol               | (1R,2R,5R)- 2-methyl-5-prop-1-en-2-ylcyclohexan-1-ol                                                       | ≥ 95%              | Mixture of isomers – composition: n, ~ 75% iso, ~ 6% neo, ~ 3% neoiso, ~ 1.3% | #37278, Sigma-Aldrich Co.  |

|           |                  |                                                     |         |       |                            |
|-----------|------------------|-----------------------------------------------------|---------|-------|----------------------------|
| <b>10</b> | (+)-isopulegol   | (1S,2R,5S)-5-methyl-2-prop-1-en-2-ylcyclohexan-1-ol | ≥ 99%   | Purum | #59765, Sigma-Aldrich Co.  |
| <b>11</b> | (-)-isopulegol   | (1R,2S,5R)-5-methyl-2-prop-1-en-2-ylcyclohexan-1-ol | ≥ 99%   | Purum | #59770, Sigma-Aldrich Co.  |
| <b>12</b> | (R)-(+)-pulegone | (5R)-5-methyl-2-propan-2-ylidienecyclohexan-1-one   | ≥ 98.5% | Purum | #82569, Sigma-Aldrich Co.  |
| <b>13</b> | (S)-(-)-pulegone | (5S)-5-methyl-2-propan-2-ylidienecyclohexan-1-one   | 98%     | Purum | #328847, Sigma-Aldrich Co. |
| <b>14</b> | (-)-menthone     | (2S,5R)-5-methyl-2-propan-2-ylcyclohexan-1-one      | ≥ 99%   | Purum | #63677, Sigma-Aldrich Co.  |
| <b>15</b> | (-)-menthol      | (1R,2S,5R)-5-methyl-2-propan-2-ylcyclohexan-1-ol    | ≥ 99%   | Purum | #63660, Sigma-Aldrich Co.  |
| <b>16</b> | β-myrcene        | 7-methyl-3-methylideneocta-1,6-diene                | ≥ 90%   | Purum | #64643, Sigma-Aldrich Co.  |
| <b>17</b> | <i>p</i> -cymene | 1-methyl-4-propan-2ylbenzene                        | ≥ 99.5% | Purum | #30039, Sigma-Aldrich Co.  |
| <b>18</b> | carvacrol        | 2-methyl-5-propan-2ylphenol                         | ≥ 97%   | Purum | #22051, Sigma-Aldrich Co.  |
| <b>19</b> | thymol           | 5-methyl-2-propan-2ylphenol                         | 98%     | Purum | #30433, BDH                |

\*Purity relative to sum of enantiomers determined by gas chromatography

\*\*The purities of **(1)** (96.9%) and **(4)** (96.8%), which were in stock at our lab for over a year, were confirmed by GC-MS prior to starting the experiments and found to be within the limits defined by the manufacturer.
